# Supplementary material for: High-Q chiral metasurface with quasi-BIC for tunable circular dichroism and refractive index sensing
Source: Royal Society of Chemistry journal article supplement (doi:10.1039/d5tc03836g), 2026-01-01
Supplement: d5tc03836g1.pdf [file d5tc03836g1.pdf]

## Supporting Information

### High-Q chiral metasurface with quasi-BIC for tunable circular dichroism and refractive index sensing

Zongli Hu,<sup>a</sup> Wei Su,<sup>\*b</sup> Jialing Shi,<sup>a</sup> and Bin Tang<sup>\*a</sup>

<sup>a</sup>.School of Microelectronics, Changzhou University, Changzhou, 213164, China. E-mail: btang@cczu.edu.cn

<sup>b</sup>.College of Mechanics and Engineering Science, Hohai University, Nanjing, 211100, China. E-mail: opticsu@hhu.edu.cn

#### Section 1. The dispersion relation of Si and SiO<sub>2</sub> in the near-infrared band

Fig. S1 shows the complex refractive index of Si and SiO<sub>2</sub> in the near-infrared band based on the experimental data [1]. As shown in the provided datasets, both materials exhibit extremely weak dispersion and negligible absorption in this spectral region: the real part  $n(\lambda)$  of Si remains around 3.48 with an imaginary part  $k(\lambda)$  close to zero, while SiO<sub>2</sub> maintains a real part near 1.45 with a vanishingly small imaginary component. Specifically, at the wavelength near 1420 nm, the real (imaginary) parts of the refractive index for Si and SiO<sub>2</sub> are 3.489 (4.26771×10<sup>-9</sup>) and 1.446 (3.53333×10<sup>-7</sup>), respectively. Therefore, performing simulations with full complex refractive indices yields negligible differences compared to using constant refractive indices, and the Q-factor and CD responses remain essentially unchanged.

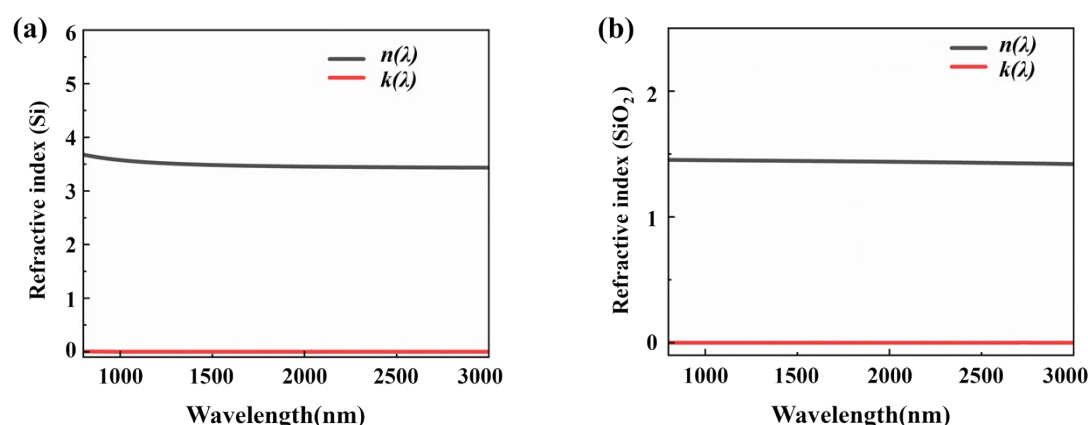

Fig. S1 (a) Complex refractive index parameter of Si; (b) Complex refractive index parameter of SiO<sub>2</sub>. The black line represents the real part  $n(\lambda)$ , and the red line denotes the imaginary part  $k(\lambda)$ .

## Section 2. Angular Robustness of Circular Dichroism (CD) Spectra at Small Off-Normal Incidence

Fig. S2 shows the circular dichroism (CD) spectrum of the proposed metasurface under oblique incidence, with incident angles  $\theta$  ranging from  $-5^\circ$  to  $+5^\circ$  in  $2^\circ$  increments. All simulations used the same geometric parameters as in the text ( $\Delta d = -5$  nm). Under normal incidence ( $\theta = 0^\circ$ ), the metasurface supports a strong intrinsic chirality quasi-BIC dominated by a toroidal dipole mode, producing a CD peak of approximately 0.7. When a smaller angular tilt is introduced ( $|\theta| \leq 5^\circ$ ), the CD amplitude decreases significantly, dropping to approximately 0.1 at  $\theta = \pm 5^\circ$ .

This performance degradation stems from the fact that intrinsic chirality quasi-BIC requires in-plane  $C_2$  symmetry-breaking coupling under strictly normal incidence. Oblique incidence introduces extrinsic chirality and opens additional radiation channels, thus altering the interference conditions required for quasi-BIC. Consequently, the  $Q$ -factor decreases, and the CD response weakens.

These results demonstrate that the proposed quasi-BIC mode is highly sensitive to the incident angle, consistent with the expectation of symmetry-protected resonances, and exhibits the strongest CD response at perpendicular incidence.

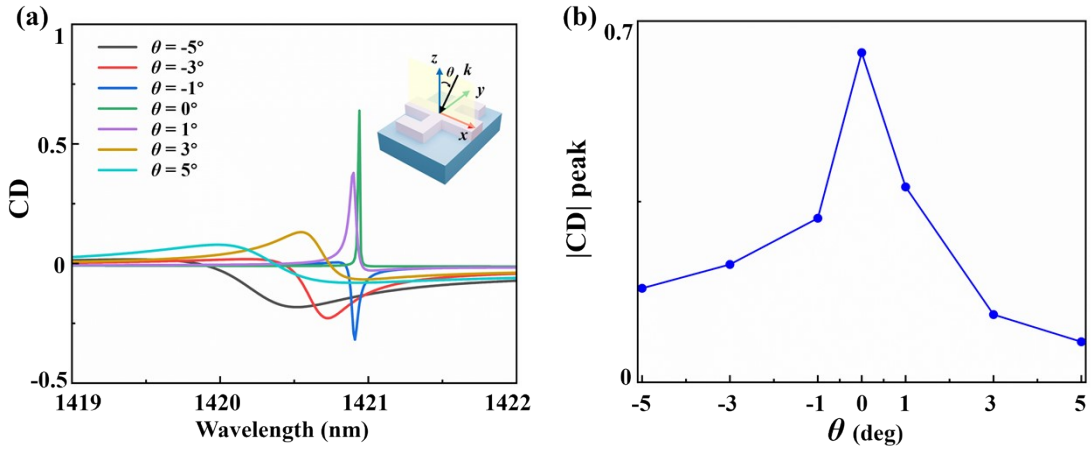

Fig. S2 (a) CD at  $\Delta d = -5$  nm with different incident angles; (b)  $|CD|$  peak under different incident angles.

### References

- [1] D. Franta, A. Dubroka, C. Wang, A. Giglia, J. Vohánka, P. Franta and I. Ohlídal, Applied Surface Science, 2017, 421, 405-419.
